# Supplementary material for: A connectional hub in the rostral anterior cingulate cortex links areas of emotion and cognitive control
Source: eLife journal article supplement (doi:10.7554/elife.43761), 2019-06-19
Supplement: supp [file elife-43761-supp-v1.zip]

Archive with 5 entries (5 files):
- elife_poa_e43761_Supplementary_file_1.zip
- elife_poa_e43761_Transparent_Reporting_File.pdf
- elife_poa_e43761_Figure_7_figure_supplement_1.pdf
- elife_poa_e43761_Figure_9_figure_supplement_1.pdf
- elife_poa_e43761_Figure_7_figure_supplement_2.pdf
