# Supplementary figures and images for: A connectional hub in the rostral anterior cingulate cortex links areas of emotion and cognitive control
Source: eLife journal article supplement (doi:10.7554/elife.43761), 2019-06-19

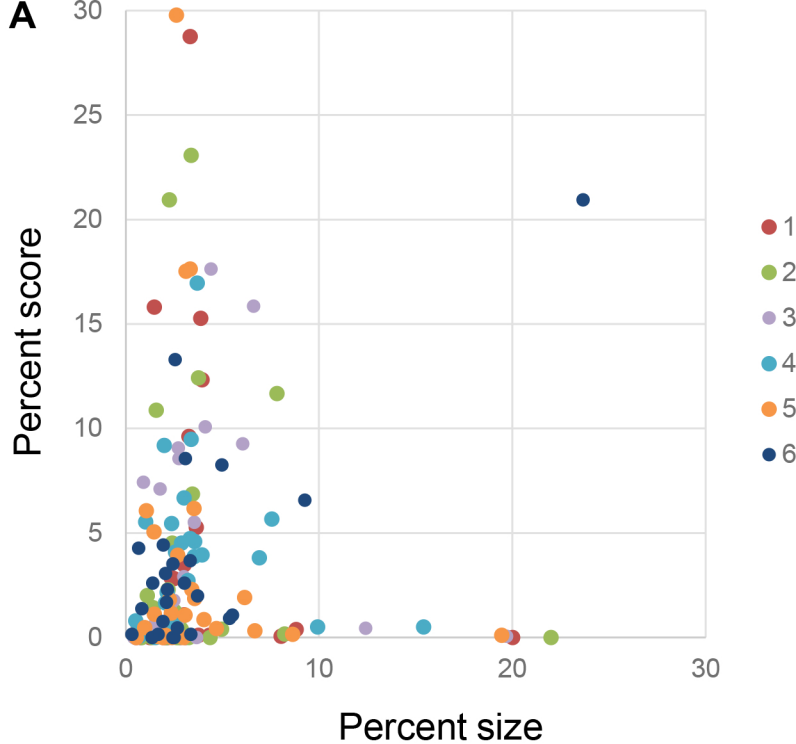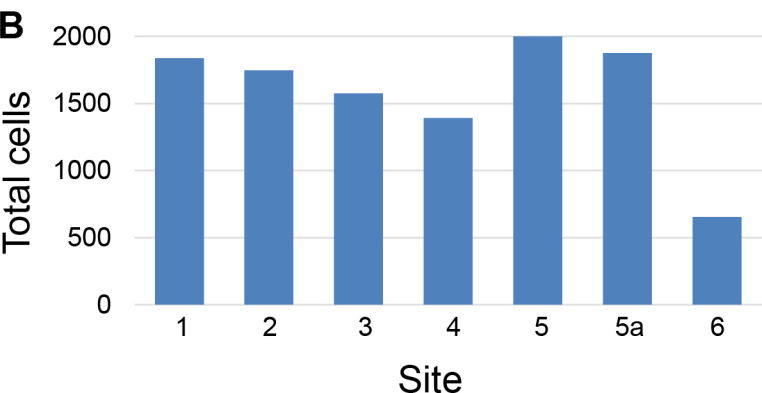

Supplement: supp [file elife-43761-supp-v1.zip › elife_poa_e43761_Figure_7_figure_supplement_1.pdf]

**A**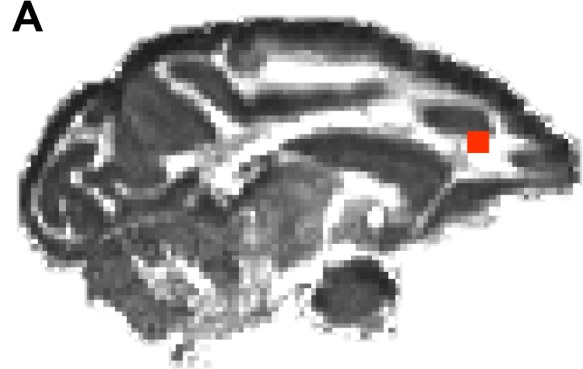**B**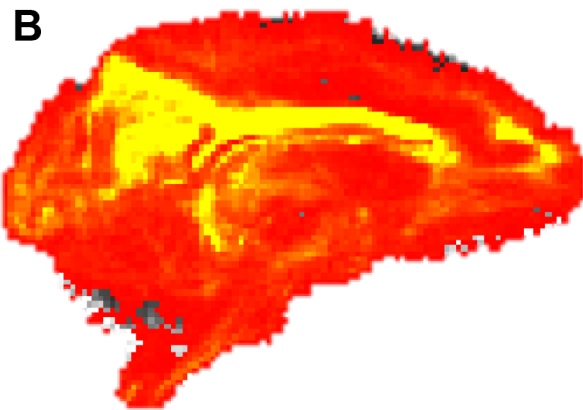**C**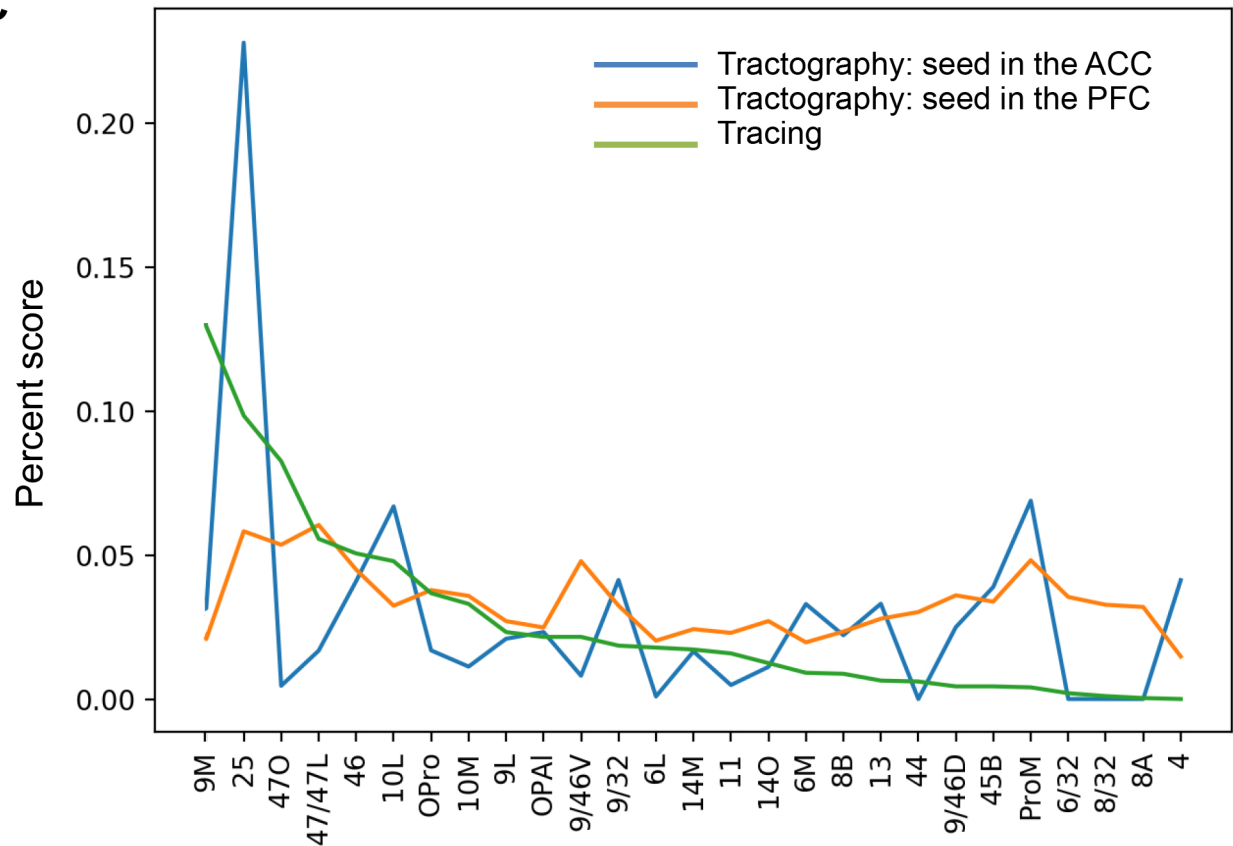

Supplement: supp [file elife-43761-supp-v1.zip › elife_poa_e43761_Figure_9_figure_supplement_1.pdf]
